# Supplementary material for: Balancing connectivity with function in silver(i) networks of pyridyltriazole (tzpa) ligands results in the formation of a metallogel
Source: Royal Society of Chemistry journal article supplement (doi:10.1039/d0dt01421d), 2020-01-01
Supplement: d0dt01421d1.pdf [file d0dt01421d1.pdf]

# **Balancing Connectivity with Function in Silver(I) networks of Pyridyltriazole (tzpa) Ligands Results in the Formation of a Metallogel**

Isabel N. Hegarty, Hannah L. Dalton, Amy D. Lynes, Benjamin Haffner,  
Matthias E. Möbius, Chris S. Hawes and Thorfinnur Gunnlaugsson

## **Supporting Information**

|                                         |          |
|-----------------------------------------|----------|
| <b>1. X-Ray Crystallography Details</b> | <b>2</b> |
| <b>2. X-ray Powder Diffraction</b>      | <b>3</b> |
| <b>3. Thermogravimetric Analysis</b>    | <b>3</b> |
| <b>4. Gel photographs</b>               | <b>4</b> |
| <b>5. NMR Spectra</b>                   | <b>5</b> |

**Table S1** Crystal and refinement parameters for structures **4**, **1** and  $\{[Ag_2(\mathbf{1})_2](CF_3SO_3)_2\}_n$ 

| Identification code                                           | <b>4</b>                                                                     | <b>1</b>                                                                     | $\{[Ag_2(\mathbf{1})_2](CF_3SO_3)_2\}_n$                                         |
|---------------------------------------------------------------|------------------------------------------------------------------------------|------------------------------------------------------------------------------|----------------------------------------------------------------------------------|
| Empirical formula                                             | C <sub>18</sub> H <sub>20</sub> N <sub>2</sub> O <sub>5</sub> Si             | C <sub>21</sub> H <sub>18</sub> N <sub>6</sub> O                             | C <sub>22</sub> H <sub>18</sub> AgF <sub>3</sub> N <sub>6</sub> O <sub>4</sub> S |
| Formula weight                                                | 308.45                                                                       | 370.41                                                                       | 627.35                                                                           |
| Temperature/K                                                 | 100(2)                                                                       | 100(2)                                                                       | 100(2)                                                                           |
| Crystal system                                                | triclinic                                                                    | orthorhombic                                                                 | monoclinic                                                                       |
| Space group                                                   | <i>P</i> -1                                                                  | <i>P</i> 2 <sub>1</sub> 2 <sub>1</sub> 2                                     | <i>P</i> 2 <sub>1</sub> / <i>n</i>                                               |
| <i>a</i> /Å                                                   | 5.8838(2)                                                                    | 14.781(2)                                                                    | 17.0839(18)                                                                      |
| <i>b</i> /Å                                                   | 11.1708(4)                                                                   | 19.903(2)                                                                    | 9.8330(11)                                                                       |
| <i>c</i> /Å                                                   | 13.3912(5)                                                                   | 6.1151(6)                                                                    | 27.626(3)                                                                        |
| $\alpha$ /°                                                   | 84.6200(10)                                                                  | 90                                                                           | 90                                                                               |
| $\beta$ /°                                                    | 80.2820(10)                                                                  | 90                                                                           | 92.821(2)                                                                        |
| $\gamma$ /°                                                   | 77.1310(10)                                                                  | 90                                                                           | 90                                                                               |
| Volume/Å <sup>3</sup>                                         | 844.29(5)                                                                    | 1798.9(4)                                                                    | 4635.1(9)                                                                        |
| <i>Z</i>                                                      | 2                                                                            | 4                                                                            | 8                                                                                |
| $\rho_{\text{calc}}/\text{cm}^3$                              | 1.213                                                                        | 1.368                                                                        | 1.798                                                                            |
| $\mu/\text{mm}^{-1}$                                          | 0.142                                                                        | 0.721                                                                        | 1.028                                                                            |
| <i>F</i> (000)                                                | 328.0                                                                        | 776.0                                                                        | 2512.0                                                                           |
| Crystal size/mm <sup>3</sup>                                  | 0.28 × 0.2 × 0.07                                                            | 0.22 × 0.06 × 0.05                                                           | 0.4 × 0.07 × 0.06                                                                |
| Radiation                                                     | MoK $\alpha$ ( $\lambda$ = 0.71073)                                          | CuK $\alpha$ ( $\lambda$ = 1.54178)                                          | MoK $\alpha$ ( $\lambda$ = 0.71073)                                              |
| 2 $\theta$ range for data collection/°                        | 3.746 to 55.302                                                              | 10.718 to 136.618                                                            | 2.744 to 52.186                                                                  |
| Index ranges                                                  | -7 ≤ <i>h</i> ≤ 7, -14 ≤ <i>k</i> ≤ 14, -17 ≤ <i>l</i> ≤ 17                  | -16 ≤ <i>h</i> ≤ 17, -22 ≤ <i>k</i> ≤ 23, -7 ≤ <i>l</i> ≤ 5                  | -16 ≤ <i>h</i> ≤ 21, -12 ≤ <i>k</i> ≤ 12, -34 ≤ <i>l</i> ≤ 34                    |
| Reflections collected                                         | 10456                                                                        | 10412                                                                        | 39534                                                                            |
| Independent reflections                                       | 3925 [ <i>R</i> <sub>int</sub> = 0.0194, <i>R</i> <sub>sigma</sub> = 0.0219] | 3248 [ <i>R</i> <sub>int</sub> = 0.1015, <i>R</i> <sub>sigma</sub> = 0.0898] | 9198 [ <i>R</i> <sub>int</sub> = 0.0647, <i>R</i> <sub>sigma</sub> = 0.0607]     |
| Data/restraints/parameters                                    | 3925/0/202                                                                   | 3248/65/320                                                                  | 9198/2/673                                                                       |
| Goodness-of-fit on <i>F</i> <sup>2</sup>                      | 1.038                                                                        | 1.056                                                                        | 1.009                                                                            |
| Final <i>R</i> indexes [ <i>I</i> >= 2 $\sigma$ ( <i>I</i> )] | <i>R</i> <sub>1</sub> = 0.0317, <i>wR</i> <sub>2</sub> = 0.0776              | <i>R</i> <sub>1</sub> = 0.0823, <i>wR</i> <sub>2</sub> = 0.2140              | <i>R</i> <sub>1</sub> = 0.0545, <i>wR</i> <sub>2</sub> = 0.1191                  |
| Final <i>R</i> indexes [all data]                             | <i>R</i> <sub>1</sub> = 0.0392, <i>wR</i> <sub>2</sub> = 0.0817              | <i>R</i> <sub>1</sub> = 0.1011, <i>wR</i> <sub>2</sub> = 0.2264              | <i>R</i> <sub>1</sub> = 0.0918, <i>wR</i> <sub>2</sub> = 0.1355                  |
| Largest diff. peak/hole / e Å <sup>-3</sup>                   | 0.31/-0.24                                                                   | 0.23/-0.25                                                                   | 2.01/-0.88                                                                       |
| Flack parameter                                               | n/a                                                                          | 0.1(12)                                                                      | n/a                                                                              |
| CCDC No.                                                      | 1994746                                                                      | 1994747                                                                      | 1994748                                                                          |

## X-Ray Powder Diffraction

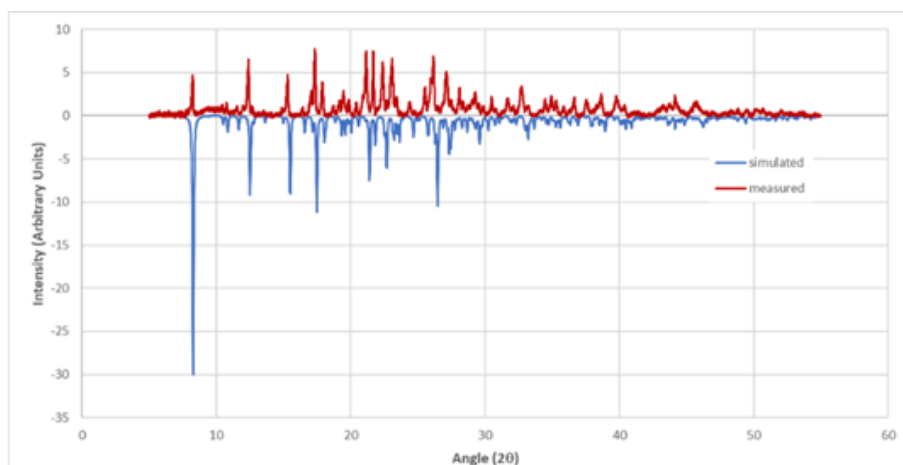

**Figure S1** X-ray diffraction pattern for  $\{[Ag_2(I)_2](CF_3SO_3)_2\}_n$  measured at (100 K) (blue) compared to the pattern simulated from the single crystal X-ray data obtained at (100K) (red)

## Thermogravimetric Analysis

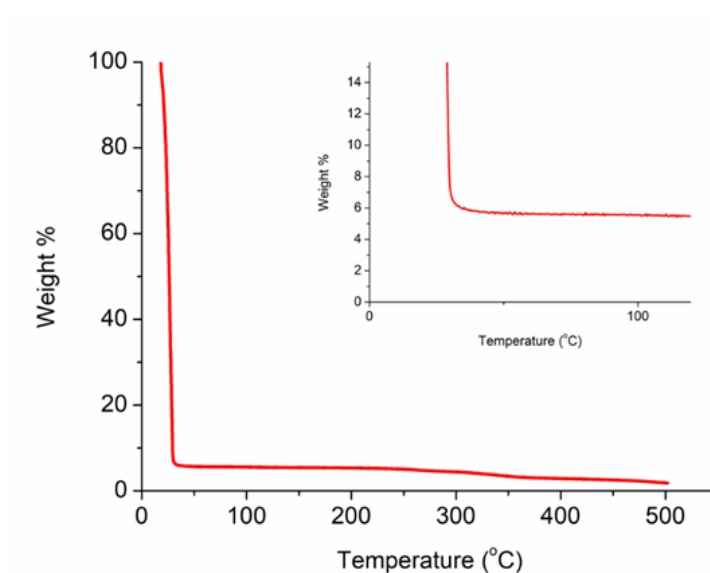

**Figure S2** TGA thermograph of **2**.  $AgBF_4$  gel showing weight loss of 5.5% before 50 °C.

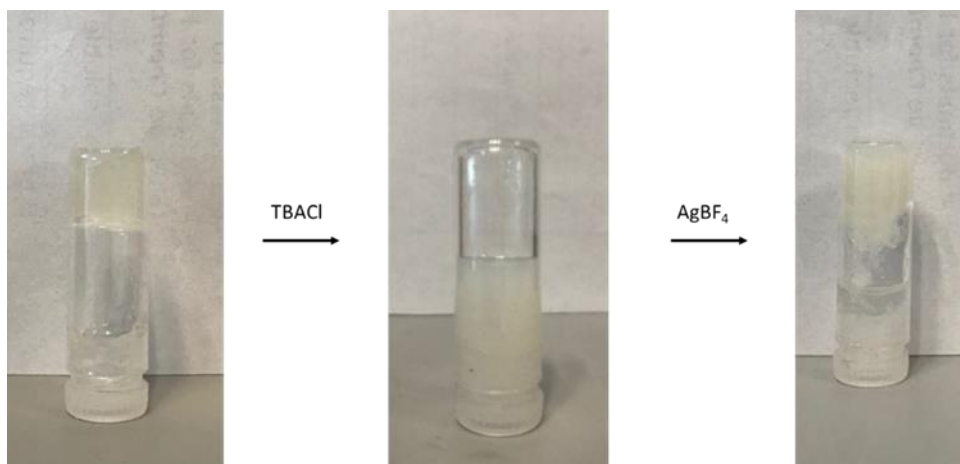

**Figure S3** (Left) Inversion test of  $\text{AgBF}_4$  gel of **2** in  $\text{CH}_3\text{CN}$  in 1:1 molar ratio. (Middle) Addition of  $\text{TBACl}$  resulting in destruction of the gel network. (Right) Addition of  $\text{AgBF}_4$  to re-form the  $\text{AgBF}_4$  gel of **2** demonstrating chemoreversibility of the system.

## NMR Spectra

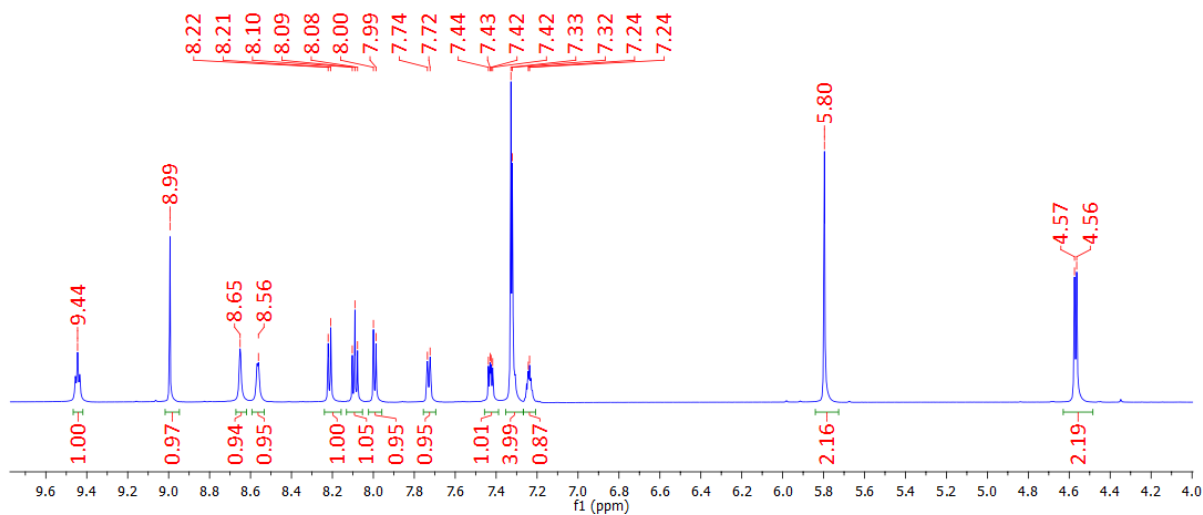

Figure S4  $^1\text{H}$  NMR spectrum (600 MHz, DMSO) of **1**.

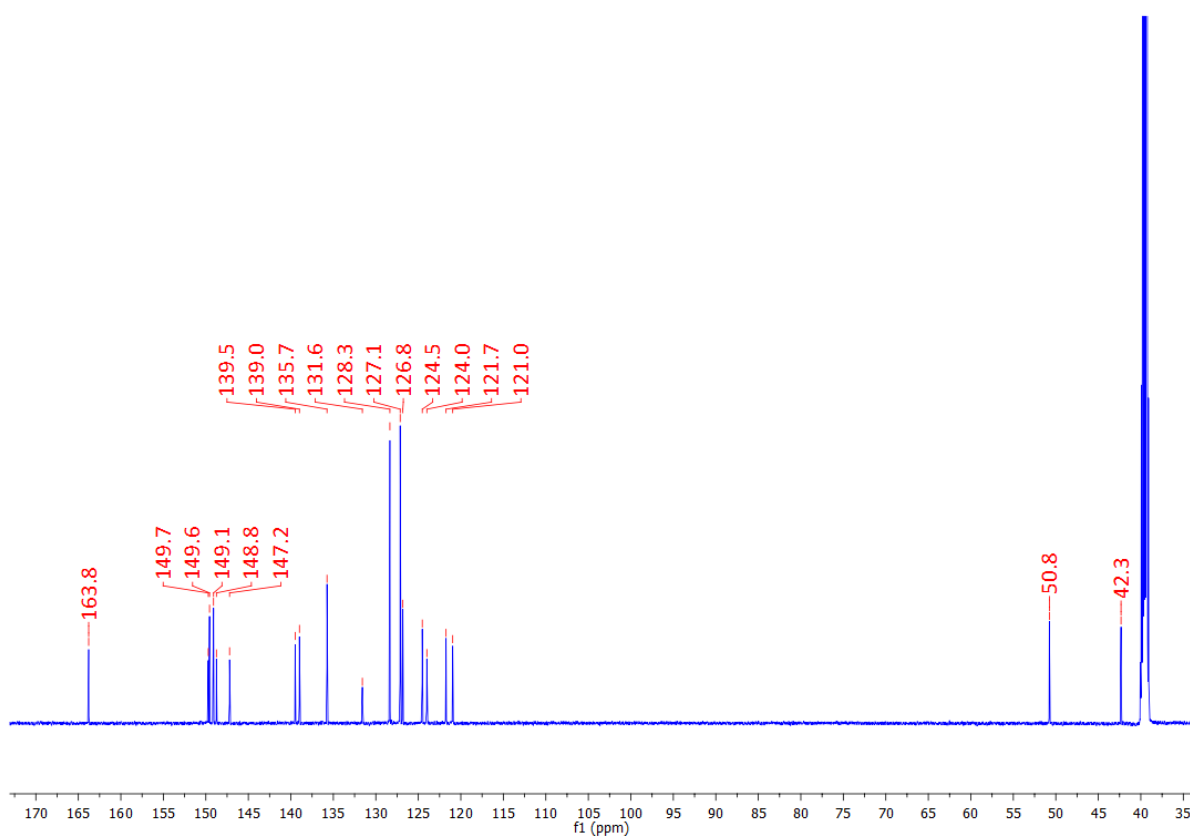

Figure S5  $^{13}\text{C}$  NMR spectrum (150 MHz, DMSO) of **1**.

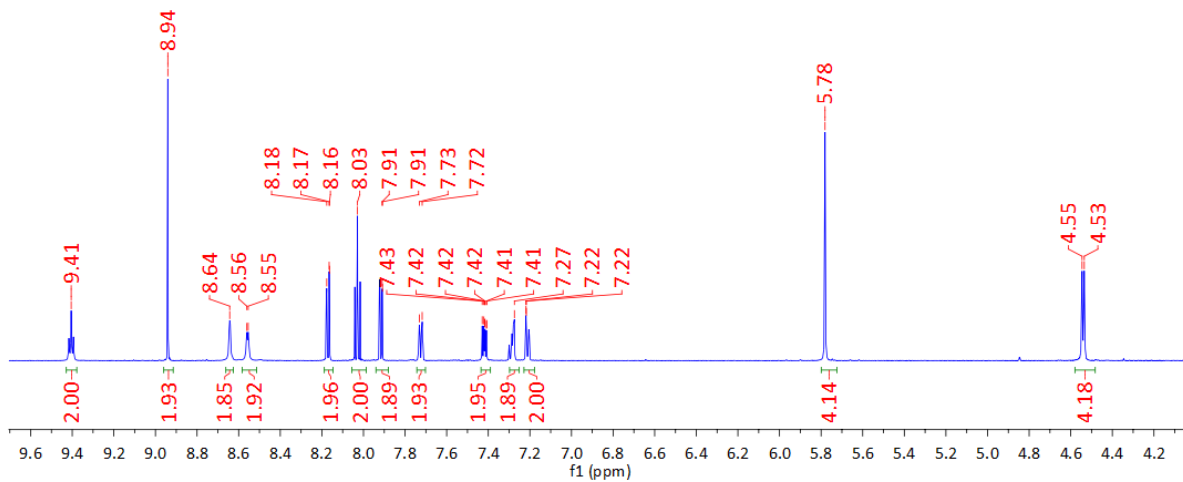

Figure S6  $^1\text{H}$  NMR spectrum (600 MHz, DMSO) of **2**.

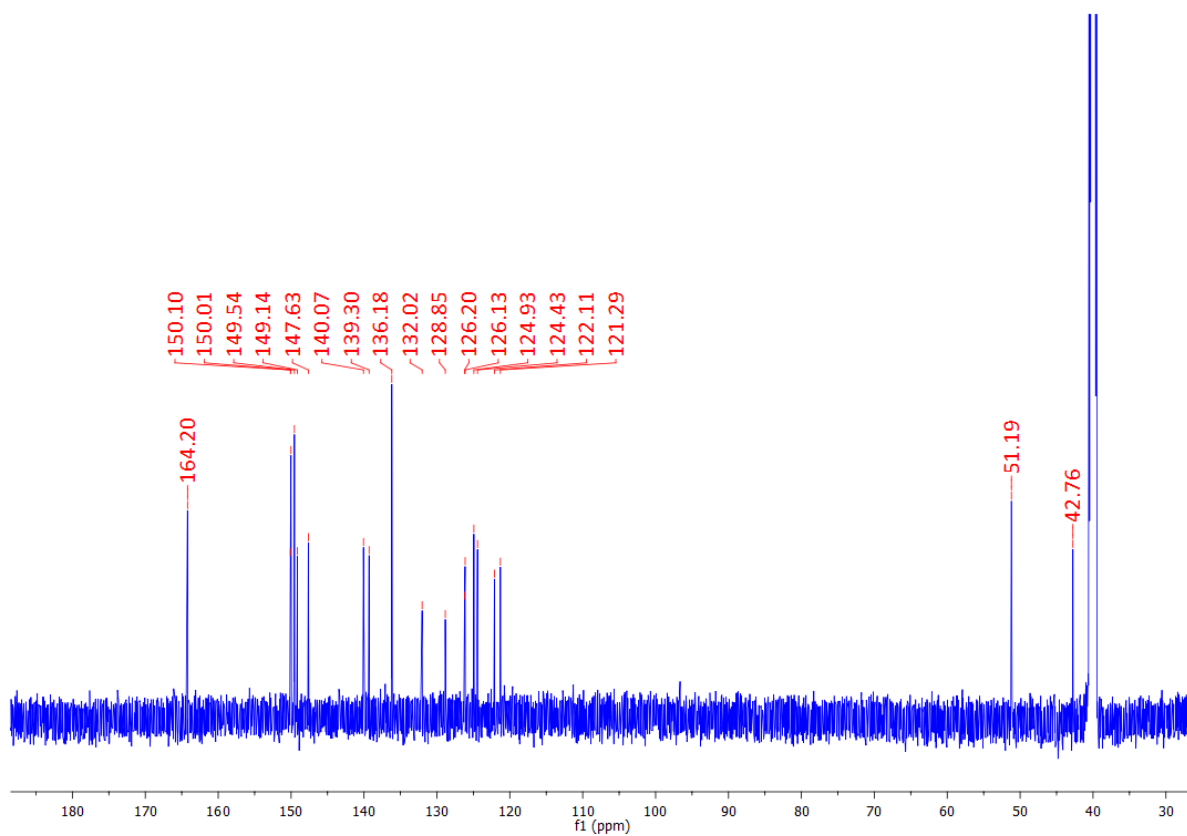

Figure S7  $^{13}\text{C}$  NMR spectrum (150 MHz, DMSO) of **2**.
